# Supplementary material for: Viral anti‐inflammatory serpin reduces immuno‐coagulopathic pathology in SARS‐CoV‐2 mouse models of infection
Source: PubMed Central journal article supplement (PMC10493584; doi:10.15252/emmm.202317376), 2023-08-03
Supplement: EMMM-15-e17376-s004.pdf [file EMMM-15-e17376-s004.pdf]

## Appendix – Supplementary Material

### Table of Contents

Appendix Figure S1

Appendix Figure S2

Appendix Table S1

Appendix Table S2

### Figure Legends

**Appendix Figure S1** - Western blot illustrating PEGSerp-1 binding to His labelled urokinase type plasminogen activator (uPA).

**Appendix Figure S2** - Body weight measured after SARS-CoV-2 MA30 infection – Four day follow up with prophylactic PEGSerp-1 treatments (C57BL/6 mouse model). A. mean body weights for SARS MA30 infected mice with and without PEGSerp-1 treatment demonstrates significantly improved weight gain on days 4 and 4 with PEGSerp-1 treatment (Red) given daily when compared to saline controls (Black).

B. Individual weights measured for each mouse over the 4 day follow up. N = 19 mice. Student's T test - \*  $p < 0.05$ , \*\*  $p < 0.01$

**Appendix Table S1** - Immunoprecipitation of PEGserp-1 bound molecules as measured by mass spectrometry demonstrating pull down of thrombolytic and complement proteases. Immunoprecipitation of PEGSerp-1 bound proteins form a lupuds lung hemorrhage model (Guo 2021).

**Appendix Table S2** - Primer sequences used for qPCR analyses of SARS-CoV-2 infected lung and heart extracts.

Appendix Figure S1

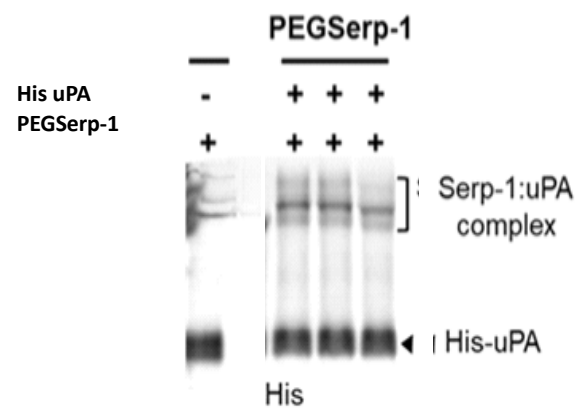

Appendix Figure S2. Prophylactic PEGSerp-1 treatments in SARS-CoV-2 MA30 Day 4 follow up

A. Mean body weight

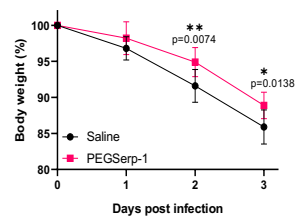

B. Individual Mean body weights

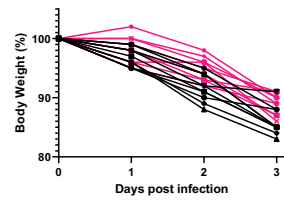

**Appendix Table S1- MS analysis DAH PEG Serp-1  
Immunoprecipitation (IP)**

| <b>Accession</b> | <b>Description</b>       | <b>Symbol</b> | <b># Peptides</b> |
|------------------|--------------------------|---------------|-------------------|
| P01027           | Complement C3            | C3 PE         | 34                |
| B7FAV1           | Filamin, alpha           | Flna PE       | 23                |
| P60710           | Actin, cytoplasmic 1     | Actb PE       | 17                |
| E9PV24           | Fibrinogen alpha chain   | Fga PE        | 12                |
| P20918           | Plasminogen              | Plg PE        | 11                |
| P01029           | Complement C4-B          | C4b PE        | 9                 |
| P98086           | Complement C1q subunit A | C1qa PE       | 4                 |
| P04186           | Complement factor B      | Cfb PE        | 4                 |
| Q8CG14           | Complement C1s-A         | C1sa PE       | 4                 |
| P14106           | Complement C1q subunit B | C1qb PE       | 3                 |
| Q8CG16           | Complement C1r-A         | C1ra PE       | 3                 |
| Q02105           | Complement C1q subunit C | C1qc PE       | 2                 |

\*Average Xcorr >4.0

Appendix Table S2 - Primer Sequences for qPCR

| Gene          | Primers                   |
|---------------|---------------------------|
| MCP-1F        | CTCACCTGCTGCTACTCATT      |
| MCP-1R        | ACTACAGCTCTTTGGGACAC      |
| Fxa-F         | GGAACACAGAGAAGGAAGAAGG    |
| Fxa-R         | CTCAGCACGGCGATATCATAG     |
| GAPDH-F       | CATCACTGCCACCCAGAAAGACTG  |
| GAPDH-R       | ATGCCAGTGAAGCTCCCGTTTCCAG |
| GzmB-F        | GGCGCAATGTCAATGTGAAG      |
| GzmB-R        | CTGTCAGCTCAACCTTTGTAG     |
| IL-10F        | ACAGCCGGGAAGACAATAAC      |
| IL-10R        | CAGCTGGTCTTTGTTGAAAG      |
| IL-1bF        | GCAACTGTTCTGAACCTCAACT    |
| IL-1bR        | ATCTTTTGGGGTCCGTCAACT     |
| IL-6F         | GATAAGCTGGAGTCACAGAAGG    |
| IL-6R         | TTGCCGAGTAGATCTCAAAGTG    |
| MMP2F         | GTTCAACGGTCGGGAATACA      |
| MMP2R         | GCCATACTGCCATCCTTCT       |
| MMP9F         | TGCACTGGGCTTAGATCATT      |
| MMP9R         | TGCCGTCTATGTCGTCTTTATTC   |
| Neuroserpin-F | TTCTCTCCAAAGCTGTTTAC      |
| Neuroserpin-R | CAGCACAGCCATCCTACTAATC    |
| PAI-1F        | CTCCACAGCCTTTGTCATCT      |
| PAI-1R        | ATTGTCTCTGTCGGTTGTG       |
| PAR2/F2r1-F   | TTAGAAACCCAGCCTCCAATC     |
| PAR2/F2r1-R   | AATGTAGACGACCCGGAAGAAAG   |
| TGFb1-F       | GGTGGTATACTGAGACACCTTG    |
| TGFb1-R       | CCCAAGGAAAGGTAGGTGATAG    |
| TNF-F         | TTGTCTACTCCAGGTTCTCT      |
| TNF-R         | GAGGTTGACTTTCTCCTGGTATG   |
| TPA-F         | GGGAATACATGGGAGGTTTCCAG   |
| TPA-R         | GACTGGTGCTGTTGGTAAGT      |
| UPA-F         | CGCACACTGCTTCATTCAAC      |
| UPA-R         | GCTCCACCTCAAACCTCATCT     |
| UPAR-F        | GAGCTTGAAGGATGAGGACTAC    |
| UPAR-R        | TTCAGGAAGTGAAAGGTCTGG     |
| VEGF-F        | CACCTCCAGAAACACGACAAAC    |
| VEGF-R        | TGGAACCGGCATCTTTATCTC     |
| C1INH-F       | GCTGAGAACCAACCAATAAGA     |
| C1INH-R       | CCACTTGGCACTCAAGTAGAC     |
